# Supplementary material for: Identification and characterization of the first endogenous phospholipase A2 inhibitor from a non-venomous tropical snake, Boa constrictor (Serpentes: Boidae)
Source: PubMed Central journal article supplement (PMC7092641; doi:10.1590/1678-9199-jvatitd-2019-0044), 2020-03-13
Supplement: 1678-9199-jvatitd-26-e20190044-s1.pdf [file 1678-9199-jvatitd-26-e20190044-s1.pdf]

# Supplementary Material to "Identification and characterization of the first endogenous phospholipase A<sub>2</sub> inhibitor from a non-venomous tropical snake, *Boa constrictor* (Serpentes: Boidae)"

|                   |  |   |   |   |   |   |   |   |   |   |   |   |   |   |   |   |   |   |   |   |   |   |   |   |   |   |   |   |   |   |   |   |   |     |   |   |   |   |   |   |   |   |   |   |   |   |   |   |   |   |
|-------------------|--|---|---|---|---|---|---|---|---|---|---|---|---|---|---|---|---|---|---|---|---|---|---|---|---|---|---|---|---|---|---|---|---|-----|---|---|---|---|---|---|---|---|---|---|---|---|---|---|---|---|
| B. constrictor    |  | R | S | C | D | F | C | H | N | I | G | K | D | C | D | G | - | Y | E | Q | E | C | S | S | P | E | D | V | C | G | K | V | F | L   | E | I | S | S | A | S | L | S | V | R | T | V | R | K | N |   |
| C. d. terrificus  |  | R | S | C | D | F | C | H | N | I | G | K | D | C | D | G | - | Y | E | Q | E | C | S | S | P | E | D | V | C | G | K | V | F | L   | E | I | S | S | A | S | L | S | V | R | T | V | R | K | N |   |
| B. alternatus     |  | R | S | C | D | F | C | H | N | I | G | K | D | C | D | G | - | Y | E | Q | E | C | S | S | P | E | D | V | C | G | K | V | F | L   | E | I | S | S | A | S | L | S | V | R | T | V | R | K | N |   |
| B. erythromelas   |  | R | S | C | D | L | C | H | N | I | G | X | D | C | D | G | - | Y | E | Q | E | C | S | S | P | E | D | V | C | G | K | V | F | L   | E | I | S | S | A | S | L | S | V | R | T | V | R | K | N |   |
| B. jararaca       |  | R | S | C | D | F | C | H | N | I | G | K | D | C | D | G | - | Y | Q | E | C | S | S | P | E | D | V | C | X | K | V | F | L | E   | I | S | S | A | S | L | S | V | R | T | V | R | K | N |   |   |
| B. jararacussu    |  | R | S | C | D | F | C | H | N | I | G | K | D | C | D | G | - | Y | Q | E | C | S | S | P | E | D | V | C | G | K | V | F | L | E   | I | X | S | A | S | L | S | V | R | T | V | R | K | N |   |   |
| B. moojeni        |  | R | S | C | D | F | C | H | N | I | G | K | D | C | D | G | - | Y | Q | E | C | S | S | P | E | D | V | C | G | K | V | F | L | E   | X | S | A | S | L | S | V | R | T | V | R | K | N |   |   |   |
| B. neuwiedi       |  | R | S | C | X | C | H | N | X | G | K | D | C | D | G | - | Y | Q | E | C | S | S | P | E | D | V | C | G | K | V | F | L | E | I   | S | S | A | S | L | S | V | R | T | V | R | K | N |   |   |   |
| G. brevicaudus    |  | R | S | C | D | Y | C | H | N | I | G | K | D | C | D | G | - | Y | E | H | E | C | S | S | P | E | D | V | C | G | K | V | F | L   | E | I | S | S | A | S | L | S | V | R | T | V | R | K | N |   |
| L. muta           |  | R | S | C | D | F | C | H | N | I | G | K | D | C | D | G | - | Y | E | X | E | C | S | S | P | E | D | V | C | G | K | V | X | L   | E | I | S | S | A | S | L | S | V | R | T | V | R | K | N |   |
| P. elegans        |  | R | S | C | D | F | C | H | N | I | G | A | D | C | E | G | - | F | Q | H | E | C | S | S | P | E | D | E | C | G | K | V | F | L   | E | L | S | S | A | S | L | F | R | T | V | R | K | N |   |   |
| P. flavivididis   |  | R | S | C | D | F | C | H | N | I | G | A | D | C | E | G | - | F | Q | H | E | C | S | S | P | E | D | E | C | G | K | V | F | L   | E | I | S | S | A | S | L | S | V | R | T | V | R | K | N |   |
| E. climacophora   |  | R | S | C | E | I | C | H | N | V | G | N | D | C | G | Y | D | V | E | E | C | H | S | P | E | D | Q | C | G | K | V | F | L | E   | I | S | S | A | P | L | S | I | R | S | I | R | N | R | N |   |
| E. quadrivergata  |  | R | S | C | E | I | C | H | N | V | G | N | D | C | G | Y | D | V | E | L | C | H | S | P | E | D | Q | C | G | K | V | L | E | I   | S | S | A | P | L | S | I | R | S | S | I | R | N | R | N |   |
| S. annularis      |  | R | S | C | E | I | C | H | N | V | G | N | D | C | Y | D | V | Y | Q | E | C | D | S | P | E | D | Q | C | G | T | V | M | L | E   | G | S | L | A | P | F | S | V | R | T | I | R | N | R | N |   |
| N. scutatus       |  | H | S | C | E | I | C | H | N | F | G | K | D | C | Q | S | E | E | A | E | E | C | A | S | P | E | D | Q | C | G | T | V | L | H   | E | V | S | A | P | I | S | F | R | S | I | R | N | R | N |   |
| O. microlepidotus |  | R | S | C | X | C | H | N | F | G | K | X | C | E | S | E | A | E | E | E | C | A | S | P | E | D | Q | C | G | T | V | L | L | E   | I | S | S | A | P | I | S | F | R | X | I | R | N | R | N |   |
| O. scutellatus    |  | X | S | C | E | I | C | X | N | F | G | K | X | C | E | S | E | A | E | E | E | C | A | S | P | E | D | Q | C | G | T | V | L | L   | E | I | S | S | A | P | I | S | F | R | X | I | R | N | R | N |
| P. textilis       |  | R | S | C | E | I | C | H | N | F | G | K | V | C | D | N | E | P | A | L | E | C | A | S | P | E | D | Q | C | G | T | V | L | L   | E | I | S | S | A | P | I | S | F | R | T | I | R | N | R | N |
| M. reticulatus    |  | D | K | C | E | I | C | H | G | F | D | D | C | D | G | - | Y | Q | E | C | P | S | P | E | D | R | C | G | K | I | L | I | D | I   | A | L | A | P | V | S | F | R | A | T | K | K | N |   |   |   |
| consensus         |  | R | S | C | D |   | C | H | N |   | G | K | D | C | D | G | - | Y |   |   | E | C | S | S | P | E | D |   | C | G | K | V | F | L   | E | I | S | S | A | S | L | S | V | R | T | V | R | K | N |   |
| B. constrictor    |  | C | F | S | S | S | I | C | K | L | G | I | D | V | N | I | G | H | S | Y | I | R | G | R | V | N | C | C | E | K | E | P | C | E   | D | Q | P | F | F | G | L | P | L | S | R | P | N |   |   |   |
| C. d. terrificus  |  | C | F | S | S | S | I | C | K | L | G | I | D | V | N | I | G | H | S | Y | I | R | G | R | I | N | C | C | E | K | E | L | C | E   | D | Q | P | F | F | P | G | L | P | L | S | X | P | N |   |   |
| B. alternatus     |  | C | F | S | S | S | I | C | K | L | G | I | D | V | N | I | G | H | S | Y | I | R | G | R | I | N | C | C | E | K | E | P | C | E   | D | Q | P | F | F | P | G | L | P | L | S | R | P | N |   |   |
| B. erythromelas   |  | C | F | S | S | S | I | C | K | L | G | I | D | V | N | I | G | H | S | Y | I | X | G | R | I | N | C | C | E | K | E | P | C | E   | D | Q | P | F | F | P | G | L | P | L | S | R | P | N |   |   |
| B. jararaca       |  | C | F | S | S | S | I | C | K | L | G | I | D | V | N | I | G | H | S | Y | I | R | G | X | I | N | C | C | E | K | E | P | C | E   | D | Q | P | F | F | P | G | L | P | L | S | R | P | N |   |   |
| B. jararacussu    |  | C | F | S | S | S | I | C | K | L | G | I | D | V | N | I | G | H | S | Y | I | N | G | R | I | N | C | C | E | K | E | P | C | E   | D | Q | P | F | F | P | G | L | P | L | S | R | P | N |   |   |
| B. moojeni        |  | C | F | S | S | S | I | C | K | L | G | I | D | V | N | I | G | H | S | Y | I | R | G | X | I | N | C | C | E | K | E | P | C | E   | D | Q | P | F | F | P | G | L | P | L | S | R | P | N |   |   |
| B. neuwiedi       |  | C | F | S | S | S | I | C | K | L | G | I | D | V | N | I | G | H | S | Y | I | R | X | R | I | N | C | C | E | K | E | P | C | E   | D | Q | P | F | F | P | G | L | P | L | S | R | P | N |   |   |
| G. brevicaudus    |  | C | F | S | S | S | V | C | K | L | G | H | F | D | I | N | I | G | H | S | Y | I | R | G | R | I | N | C | C | E | K | E | P | C   | E | D | Q | P | F | F | P | G | L | P | L | S | Q | P | N |   |
| L. muta           |  | C | F | S | S | S | I | C | K | L | G | I | D | V | N | I | G | H | S | Y | I | R | G | R | X | N | C | C | E | K | E | P | C | E   | D | Q | X | F | F | P | G | L | P | L | S | X | P | N |   |   |
| P. elegans        |  | C | F | S | S | S | L | C | K | L | R | H | F | D | V | N | I | G | H | S | Y | I | R | G | R | I | N | C | C | E | K | E | P | C   | E | D | Q | S | F | F | P | G | L | P | L | S | Q | P | N |   |
| P. flavivididis   |  | C | F | S | S | S | V | C | K | L | R | H | F | D | V | N | I | G | H | S | Y | I | R | G | R | I | N | C | C | E | K | E | P | C   | E | D | Q | S | F | F | P | G | L | P | L | S | Q | P | N |   |
| E. climacophora   |  | C | F | S | S | S | L | C | K | L | E | H | F | D | V | N | T | G | E | T | Y | L | R | G | R | I | H | C | D | E | E | K | C | E   | G | R | P | F | F | P | G | L | P | L | S | H | P | N |   |   |
| E. quadrivergata  |  | C | F | S | S | S | L | C | K | L | E | H | F | D | V | N | T | G | E | T | Y | L | R | G | R | I | H | C | D | E | K | C | E | G   | R | P | F | F | P | G | L | P | L | S | H | P | N |   |   |   |
| S. annularis      |  | C | F | S | S | S | L | C | K | L | E | H | F | D | V | N | T | G | E | T | Y | L | R | G | R | I | H | C | D | E | Q | Q | K | C   | E | G | R | P | F | F | P | G | L | P | L | S | Y | P | N |   |
| N. scutatus       |  | C | F | S | S | S | L | C | K | L | E | R | F | D | I | N | I | G | H | S | Y | L | R | G | R | I | H | C | D | E | A | R | C | E   | A | Q | F | F | P | G | L | P | L | S | F | P | N |   |   |   |
| O. microlepidotus |  | C | F | S | S | S | L | C | K | L | E | H | F | D | I | N | I | G | H | S | Y | X | R | G | R | I | H | C | X | E | E | K | C | E   | A | Q | F | F | P | G | L | P | L | S | F | P | N |   |   |   |
| O. scutellatus    |  | C | F | S | S | S | L | C | K | L | E | H | F | D | I | N | I | G | H | S | Y | X | R | G | R | I | H | C | D | E | E | X | C | E   | A | Q | F | F | P | G | L | P | L | S | F | P | N |   |   |   |
| P. textilis       |  | C | F | S | S | S | L | C | K | L | E | H | F | D | I | N | I | G | H | S | Y | I | R | G | R | I | H | C | D | E | E | K | C | E   | A | Q | F | F | P | G | L | P | L | S | F | P | N |   |   |   |
| M. reticulatus    |  | C | F | S | S | S | I | C | K | L | G | R | V | D | I | H | V | D | G | V | Y | I | R | G | R | I | N | C | D | N | D | Q | E | D   | Q | P | L | G | L | P | L | S | L | Q | N |   |   |   |   |   |
| consensus         |  | C | F | S | S | S |   | C | K | L | G |   | F | D | V | N | I | G | H |   | S | Y | I | R | G | R | I | N | C | C | E | K | E | P   | C | E | D | Q | P | F | F | P | G | L | P | L | S |   | P | N |
| B. constrictor    |  | G | Y | Y | C | P | G | A | L | - | G | L | F | T | E | D | S | T | E | Y | E | A | I | C | H | G | T | E | T | K | C | I | N | I   | V | G | H | R | Y | E | N | F | - | - | - | - | P | G | D |   |
| C. d. terrificus  |  | G | Y | Y | C | P | G | A | I | - | G | L | F | T | K | D | S | T | E | Y | E | A | I | C | K | G | T | E | T | K | C | I | N | I   | V | G | H | R | Y | E | Q | F | - | - | - | - | P | G | D |   |
| B. alternatus     |  | G | Y | Y | C | P | G | A | L | - | G | L | F | T | E | D | S | T | E | Y | E | A | I | C | H | G | T | E | T | K | C | I | D | I   | V | G | H | R | Y | E | N | F | - | - | - | - | P | G | D |   |
| B. erythromelas   |  | G | Y | Y | C | P | G | A | L | - | G | L | F | T | E | D | S | T | E | Y | E | A | I | C | H | G | T | E | T | K | C | I | D | I   | V | G | H | R | H | E | N | F | F | S | A | V | P | E | D |   |
| B. jararaca       |  | G | Y | Y | C | P | G | A | L | - | G | L | F | T | E | D | S | T | E | Y | E | A | I | C | H | G | T | E | T | K | C | I | D | I   | V | G | H | R | H | E | H | F | - | - | - | - | P | G | D |   |
| B. jararacussu    |  | G | Y | Y | C | P | G | A | L | - | G | L | F | T | E | D | S | T | E | Y | E | A | I | C | H | G | T | E | T | K | C | I | D | I</ |   |   |   |   |   |   |   |   |   |   |   |   |   |   |   |   |
